# Supplementary material for: Low-Molecular-Weight Organogelators Based on N-dodecanoyl-L-amino Acids—Energy Frameworks and Supramolecular Synthons
Source: MDPI journal article supplement (doi:10.3390/ma16020702), 2023-01-11
Supplement: s1 [file s1]

# Low-molecular-weight organogelators based on *N*-dodecanoyl-L-amino acids – energy frameworks and supramolecular synthons

Barbara Mirosław <sup>1,\*</sup>, Oleg M. Demchuk <sup>2</sup>, Roman Luboradzki <sup>3</sup> and Katarzyna Tyszczyk-Rotko <sup>1</sup>

<sup>1</sup> Institute of Chemical Sciences, Faculty of Chemistry, Maria Curie-Skłodowska University in Lublin, 20-031 Lublin, Poland

<sup>2</sup> Faculty of Medicine, The John Paul II Catholic University of Lublin, 1h-Konstantynów St., 20-708 Lublin, Poland

<sup>3</sup> Institute of Physical Chemistry, Polish Academy of Sciences, 01-224 Warsaw, Poland

\* Correspondence: barbara.mirosław@mail.umcs.pl

Table S1 Crystal data and structure refinement for the studied compounds.

Table S2 Selected bond lengths and torsions in the analysed structures [Å,°].

Figure S1. <sup>1</sup>H NMR (500 MHz) and <sup>13</sup>C NMR (125 MHz) spectra in CDCl<sub>3</sub> for 1-Ala.

Figure S2. <sup>1</sup>H NMR (500 MHz) and <sup>13</sup>C NMR (125 MHz) spectra in CDCl<sub>3</sub> for 2-Pro.

Figure S3. <sup>1</sup>H NMR (500 MHz) and <sup>13</sup>C NMR (125 MHz) spectra in CDCl<sub>3</sub> for 3-Phe.

Figure S4. <sup>1</sup>H NMR (500 MHz) and <sup>13</sup>C NMR (125 MHz) spectra in CDCl<sub>3</sub> for 4-Leu.

Figure S5. <sup>1</sup>H NMR (500 MHz) and <sup>13</sup>C NMR (125 MHz) spectra in CDCl<sub>3</sub> for 5-Val.

**Table S1** Crystal data and structure refinement for the studied compounds.

| Identification code                         | 1-Ala                                                         | 2-Pro                                                         | 3-Phe                                                         | 4-Leu                                                         | 5-Val                                                         |
|---------------------------------------------|---------------------------------------------------------------|---------------------------------------------------------------|---------------------------------------------------------------|---------------------------------------------------------------|---------------------------------------------------------------|
| Empirical formula                           | C <sub>15</sub> H <sub>29</sub> NO <sub>3</sub>               | C <sub>17</sub> H <sub>31</sub> NO <sub>3</sub>               | C <sub>21</sub> H <sub>33</sub> NO <sub>3</sub>               | C <sub>18</sub> H <sub>35</sub> NO <sub>3</sub>               | C <sub>17</sub> H <sub>33</sub> NO <sub>3</sub>               |
| Formula weight                              | 271.39                                                        | 297.43                                                        | 347.48                                                        | 313.47                                                        | 299.44                                                        |
| Temperature/K                               | 120.10(10)                                                    | 120.10(10)                                                    | 120.10(10)                                                    | 120.10(10)                                                    | 120.10(10)                                                    |
| Crystal system                              | triclinic                                                     | monoclinic                                                    | orthorhombic                                                  | orthorhombic                                                  | orthorhombic                                                  |
| Space group                                 | P1                                                            | P2 <sub>1</sub>                                               | P2 <sub>1</sub> 2 <sub>1</sub> 2 <sub>1</sub>                 | P22 <sub>1</sub> 2 <sub>1</sub>                               | P2 <sub>1</sub> 2 <sub>1</sub> 2 <sub>1</sub>                 |
| a/Å                                         | 4.8852(2)                                                     | 6.65959(13)                                                   | 5.3354(2)                                                     | 5.32892(18)                                                   | 32.7663(7)                                                    |
| b/Å                                         | 5.5958(2)                                                     | 8.08116(17)                                                   | 12.7541(6)                                                    | 13.4149(4)                                                    | 9.9958(2)                                                     |
| c/Å                                         | 30.2891(13)                                                   | 15.9905(3)                                                    | 28.9824(14)                                                   | 27.0501(8)                                                    | 5.68440(11)                                                   |
| α/°                                         | 90.765(3)                                                     | 90                                                            | 90                                                            | 90                                                            | 90                                                            |
| β/°                                         | 91.034(4)                                                     | 90.4021(17)                                                   | 90                                                            | 90                                                            | 90                                                            |
| γ/°                                         | 105.561(4)                                                    | 90                                                            | 90                                                            | 90                                                            | 90                                                            |
| Volume/Å <sup>3</sup>                       | 797.37(6)                                                     | 860.54(3)                                                     | 1972.19(16)                                                   | 1933.73(10)                                                   | 1861.79(7)                                                    |
| Z                                           | 2                                                             | 2                                                             | 4                                                             | 4                                                             | 4                                                             |
| ρ <sub>calc</sub> /cm <sup>3</sup>          | 1.1303                                                        | 1.1478                                                        | 1.1703                                                        | 1.0767                                                        | 1.0677                                                        |
| μ/mm <sup>-1</sup>                          | 0.615                                                         | 0.612                                                         | 0.607                                                         | 0.564                                                         | 0.566                                                         |
| F(000)                                      | 300.9                                                         | 329.0                                                         | 762.3                                                         | 698.0                                                         | 664.0                                                         |
| Crystal size/mm <sup>3</sup>                | 0.35 × 0.20 × 0.15                                            | 0.37 × 0.20 × 0.18                                            | 0.36 × 0.18 × 0.18                                            | 0.40 × 0.20 × 0.18                                            | 0.40 × 0.22 × 0.18                                            |
| Radiation                                   | CuKα (λ = 1.54184)                                            |
| 2θ range for data collection/°              | 5.84 to 144.06                                                | 5.52 to 143.54                                                | 6.1 to 140.02                                                 | 6.54 to 144.2                                                 | 9.24 to 143.98                                                |
| Index ranges                                | -4 ≤ h ≤ 5, -6 ≤ k ≤ 6, -37 ≤ l ≤ 37                          | -6 ≤ h ≤ 8, -9 ≤ k ≤ 6, -19 ≤ l ≤ 18                          | -6 ≤ h ≤ 5, -15 ≤ k ≤ 14, -31 ≤ l ≤ 34                        | -6 ≤ h ≤ 4, -16 ≤ k ≤ 16, -29 ≤ l ≤ 32                        | -39 ≤ h ≤ 36, -12 ≤ k ≤ 10, -6 ≤ l ≤ 6                        |
| Reflections collected                       | 15118                                                         | 4825                                                          | 5142                                                          | 6310                                                          | 8144                                                          |
| Independent reflections                     | 5297 [R <sub>int</sub> = 0.0340, R <sub>sigma</sub> = 0.0330] | 2282 [R <sub>int</sub> = 0.0146, R <sub>sigma</sub> = 0.0165] | 3303 [R <sub>int</sub> = 0.0432, R <sub>sigma</sub> = 0.0541] | 3157 [R <sub>int</sub> = 0.0240, R <sub>sigma</sub> = 0.0220] | 3259 [R <sub>int</sub> = 0.0275, R <sub>sigma</sub> = 0.0228] |
| Data/restraints/parameters                  | 5297/0/354                                                    | 2282/0/191                                                    | 3303/0/227                                                    | 3157/0/303                                                    | 3259/0/204                                                    |
| Goodness-of-fit on F <sup>2</sup>           | 1.218                                                         | 0.868                                                         | 1.092                                                         | 1.067                                                         | 1.786                                                         |
| Final R indexes [I > 2σ (I)]                | R <sub>1</sub> = 0.0448                                       | R <sub>1</sub> = 0.0297                                       | R <sub>1</sub> = 0.0487                                       | R <sub>1</sub> = 0.0387                                       | R <sub>1</sub> = 0.0639                                       |
| Final R indexes [all data]                  | R <sub>1</sub> = 0.0472, wR <sub>2</sub> = 0.1537             | R <sub>1</sub> = 0.0306, wR <sub>2</sub> = 0.0900             | R <sub>1</sub> = 0.0524, wR <sub>2</sub> = 0.1494             | R <sub>1</sub> = 0.0393, wR <sub>2</sub> = 0.1046             | R <sub>1</sub> = 0.0662, wR <sub>2</sub> = 0.2052             |
| Largest diff. peak/hole / e Å <sup>-3</sup> | 0.32/-0.26                                                    | 0.18/-0.22                                                    | 0.24/-0.24                                                    | 0.19/-0.21                                                    | 0.50/-0.42                                                    |
| Flack parameter                             | 0.18(18)                                                      | 0.03(13)                                                      | 0.1(3)                                                        | 0.00(18)                                                      | -0.1(3)                                                       |
| CCDC No.                                    | 2226607                                                       | 2226609                                                       | 2231565                                                       | 2226608                                                       | 2226610                                                       |
|                                             |                                                               |                                                               | Redetermination of structure [1]                              |                                                               |                                                               |

1. Chen, J.; Boott, C.E.; Lewis, L.; Siu, A.; Al-Debasi, R.; Carta, V.; Fogh, A.A.; Kurek, D.Z.; Wang, L.; MacLachlan, M.J.; et al. Amino Acid-Containing Phase-Selective Organogelators: A Water-Based Delivery System for Oil Spill Treatment. *ACS Omega* **2020**, *5*, 18758–18765. CCDC No. 1959468, CSD Refcode: WUWJUW.

**Table S2** Selected bond lengths and torsions in the analysed structures [ $\text{\AA}$ ,  $^\circ$ ].

| Bond            | <b>1-Ala</b> | <b>2-Pro</b> | <b>3-Phe</b> | <b>4-Leu</b> | <b>5-Val</b> |
|-----------------|--------------|--------------|--------------|--------------|--------------|
| O1-C1           | 1.280(3)     | 1.3260(15)   | 1.313(3)     | 1.315(2)     | 1.312(3)     |
| O2-C1           | 1.244(3)     | 1.2040(15)   | 1.217(3)     | 1.211(2)     | 1.219(3)     |
| O3-C3           | 1.225(3)     | 1.2473(15)   | 1.246(3)     | 1.242(2)     | 1.253(3)     |
| N1-C2           | 1.462(2)     | 1.4561(16)   | 1.458(3)     | 1.453(2)     | 1.457(3)     |
| N1-C3           | 1.339(3)     | 1.3404(16)   | 1.336(3)     | 1.343(2)     | 1.336(3)     |
| O4-C16          | 1.278(3)     |              |              |              |              |
| O5-C16          | 1.259(3)     |              |              |              |              |
| O6-C18          | 1.228(3)     |              |              |              |              |
| N2-C17          | 1.448(2)     |              |              |              |              |
| N2-C18          | 1.352(2)     |              |              |              |              |
| Torsion         |              |              |              |              |              |
| N1-C3-C4-C5     | 143.7(2)     | 159.7(1)     | -119.3(2)    | -125.4(2)    | -80.5(3)     |
| N2-C18-C19-C20  | -163.5(2)    |              |              |              |              |
| C1-C2-N1-C3     | 55.0(3)      | -65.3(1)     | -102.6(2)    | -110.1(2)    | -70.9(3)     |
| C16-C17-N2-C18  | -76.8(2)     |              |              |              |              |
| C3-C4-C5-C6     | -175.1(2)    | -63.5(1)     | -172.1(2)    | 179.1(1)     | -55.8(3)     |
| C18-C19-C20-C21 | -177.6(2)    |              |              |              |              |

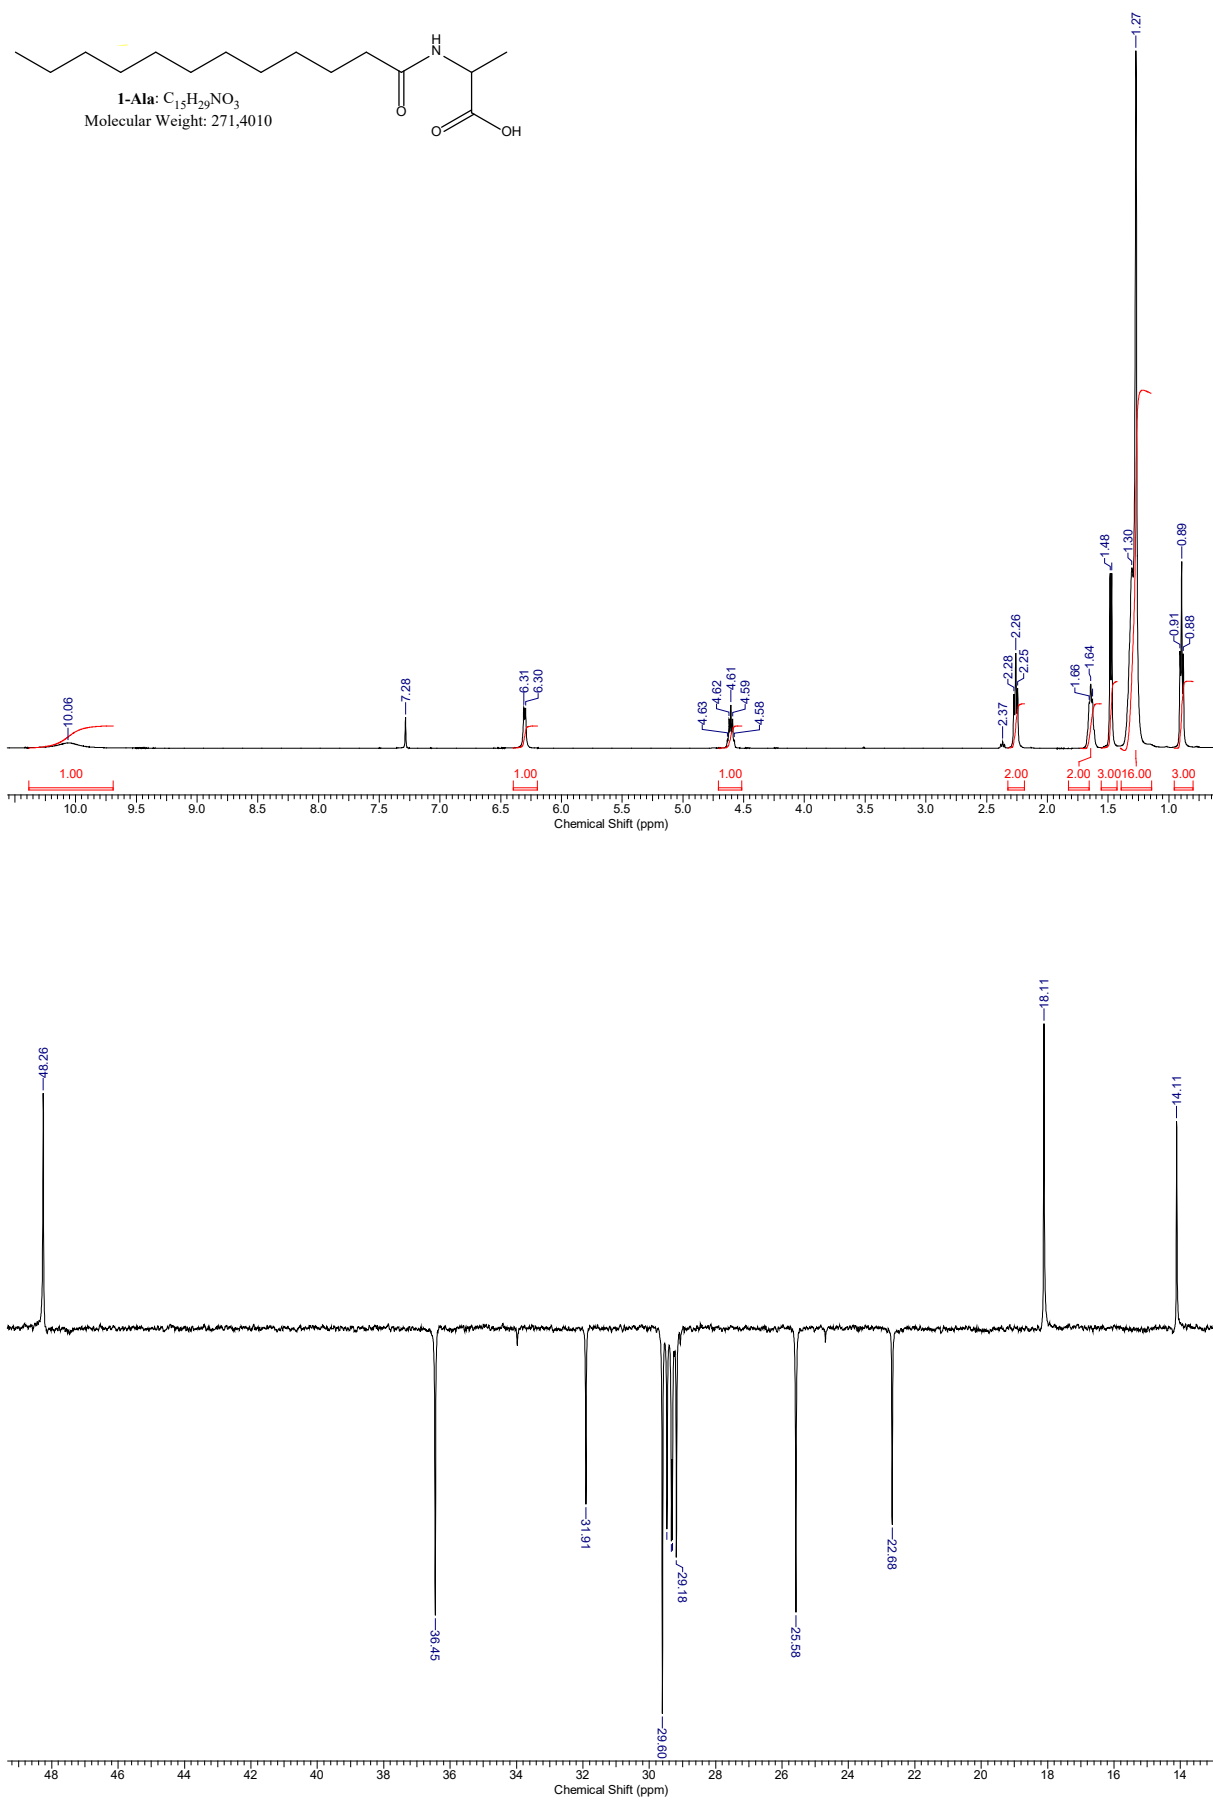

Figure S1.  $^1H$  NMR (500 MHz) and  $^{13}C$  NMR (125 MHz) spectra in  $CDCl_3$  for 1-Ala.

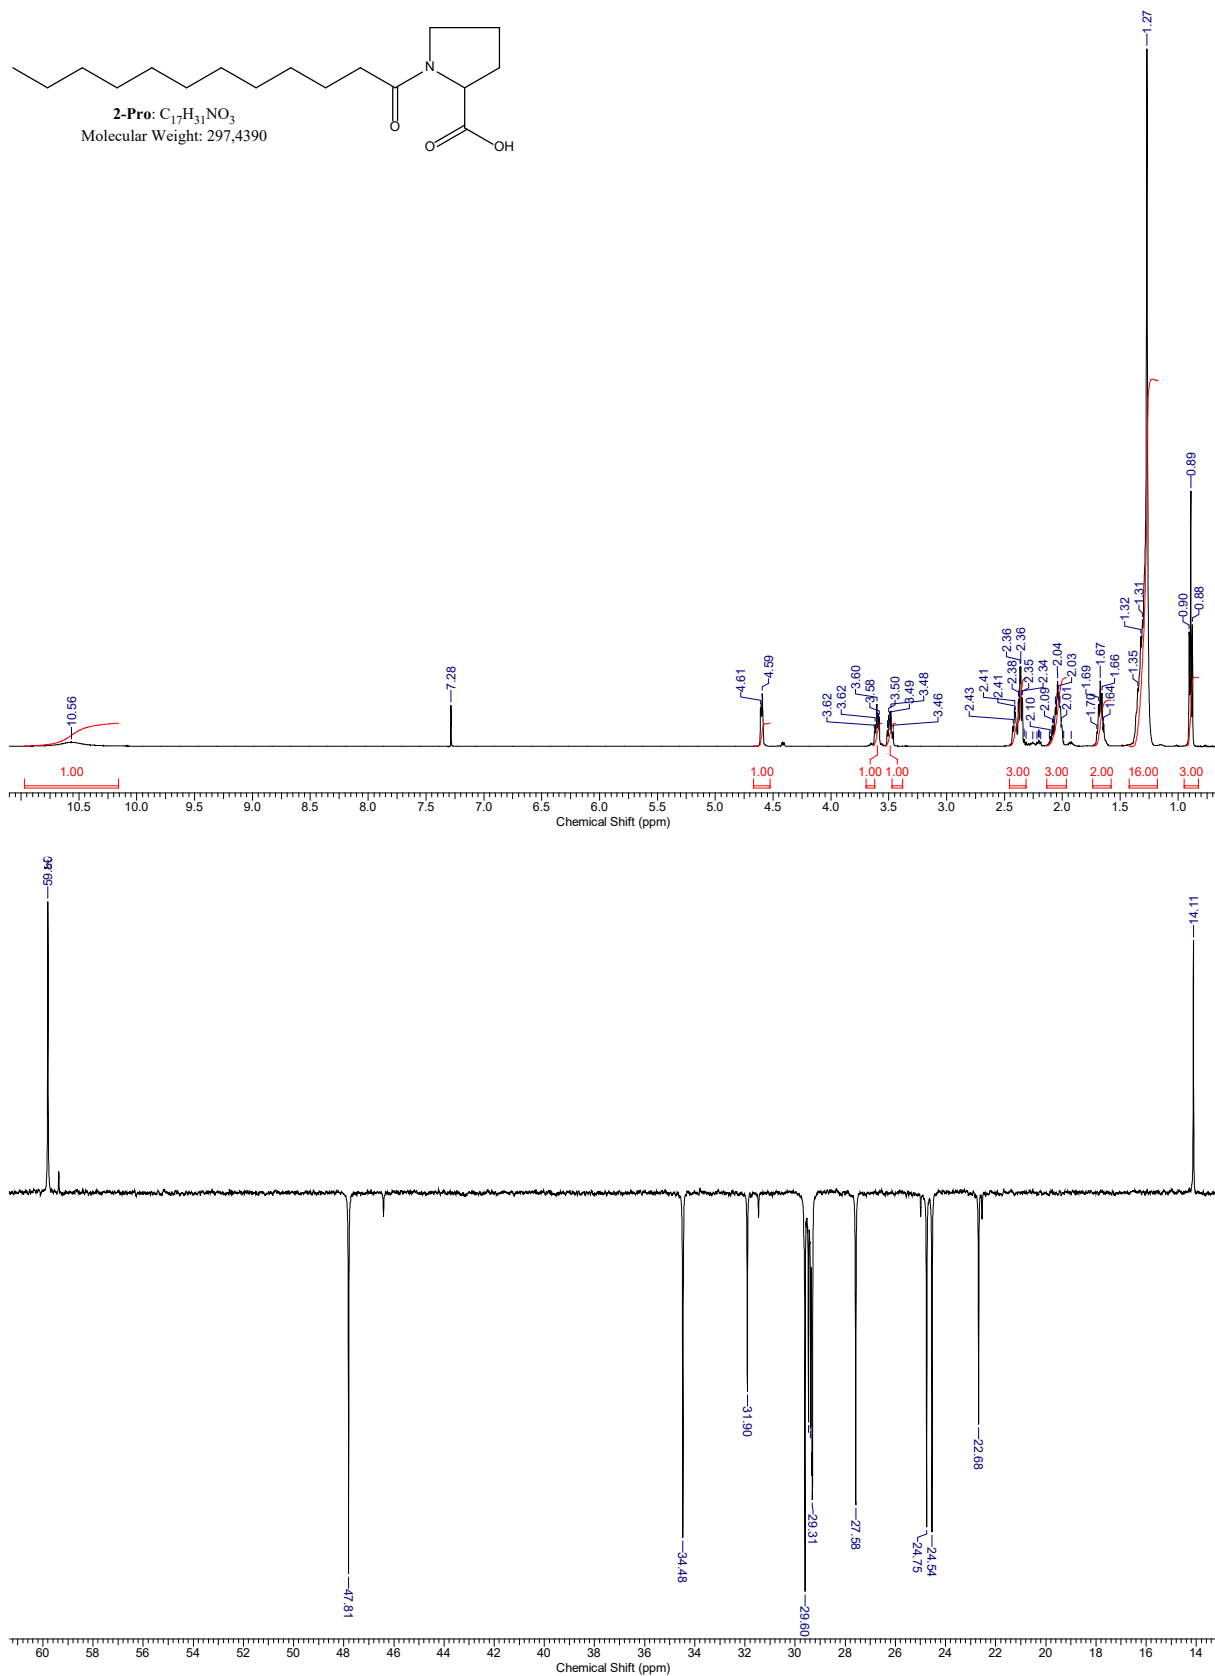

Figure S2. <sup>1</sup>H NMR (500 MHz) and <sup>13</sup>C NMR (125 MHz) spectra in CDCl<sub>3</sub> for 2-Pro.

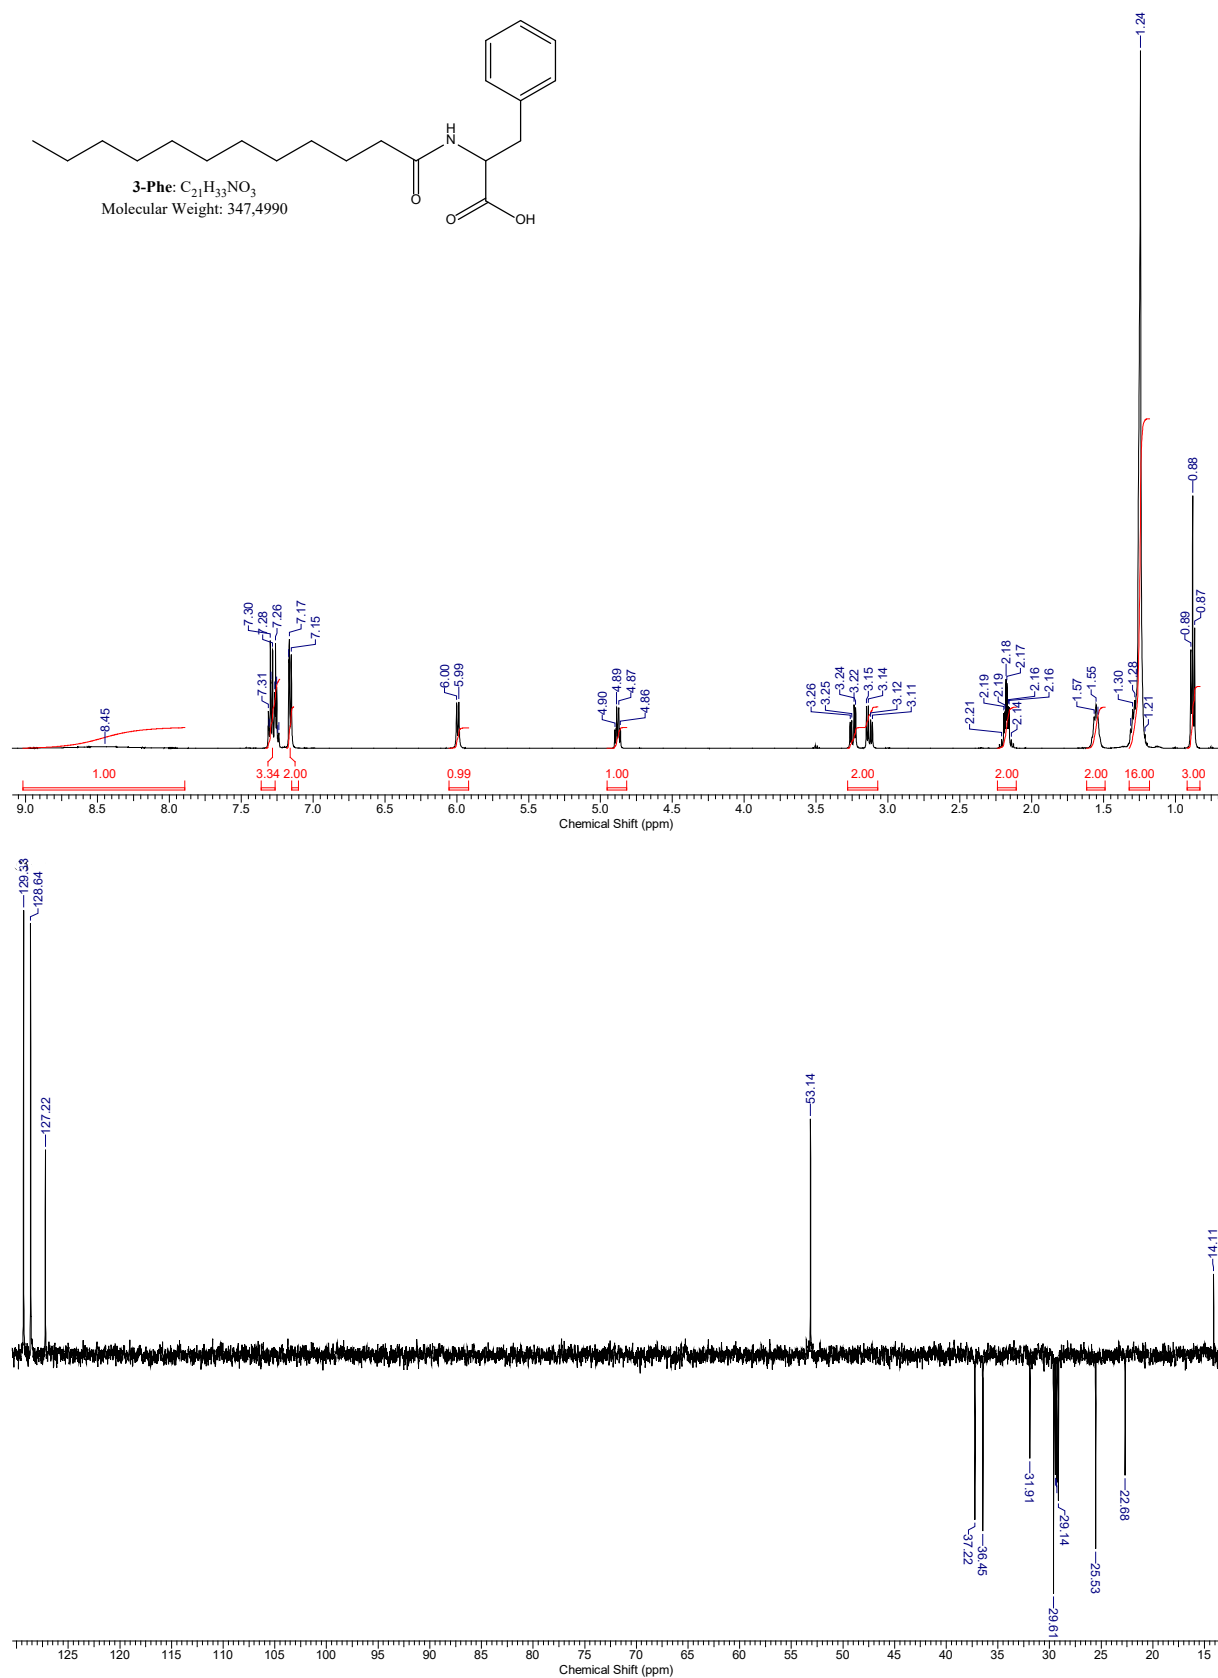

Figure S3. <sup>1</sup>H NMR (500 MHz) and <sup>13</sup>C NMR (125 MHz) spectra in CDCl<sub>3</sub> for 3-Phe.

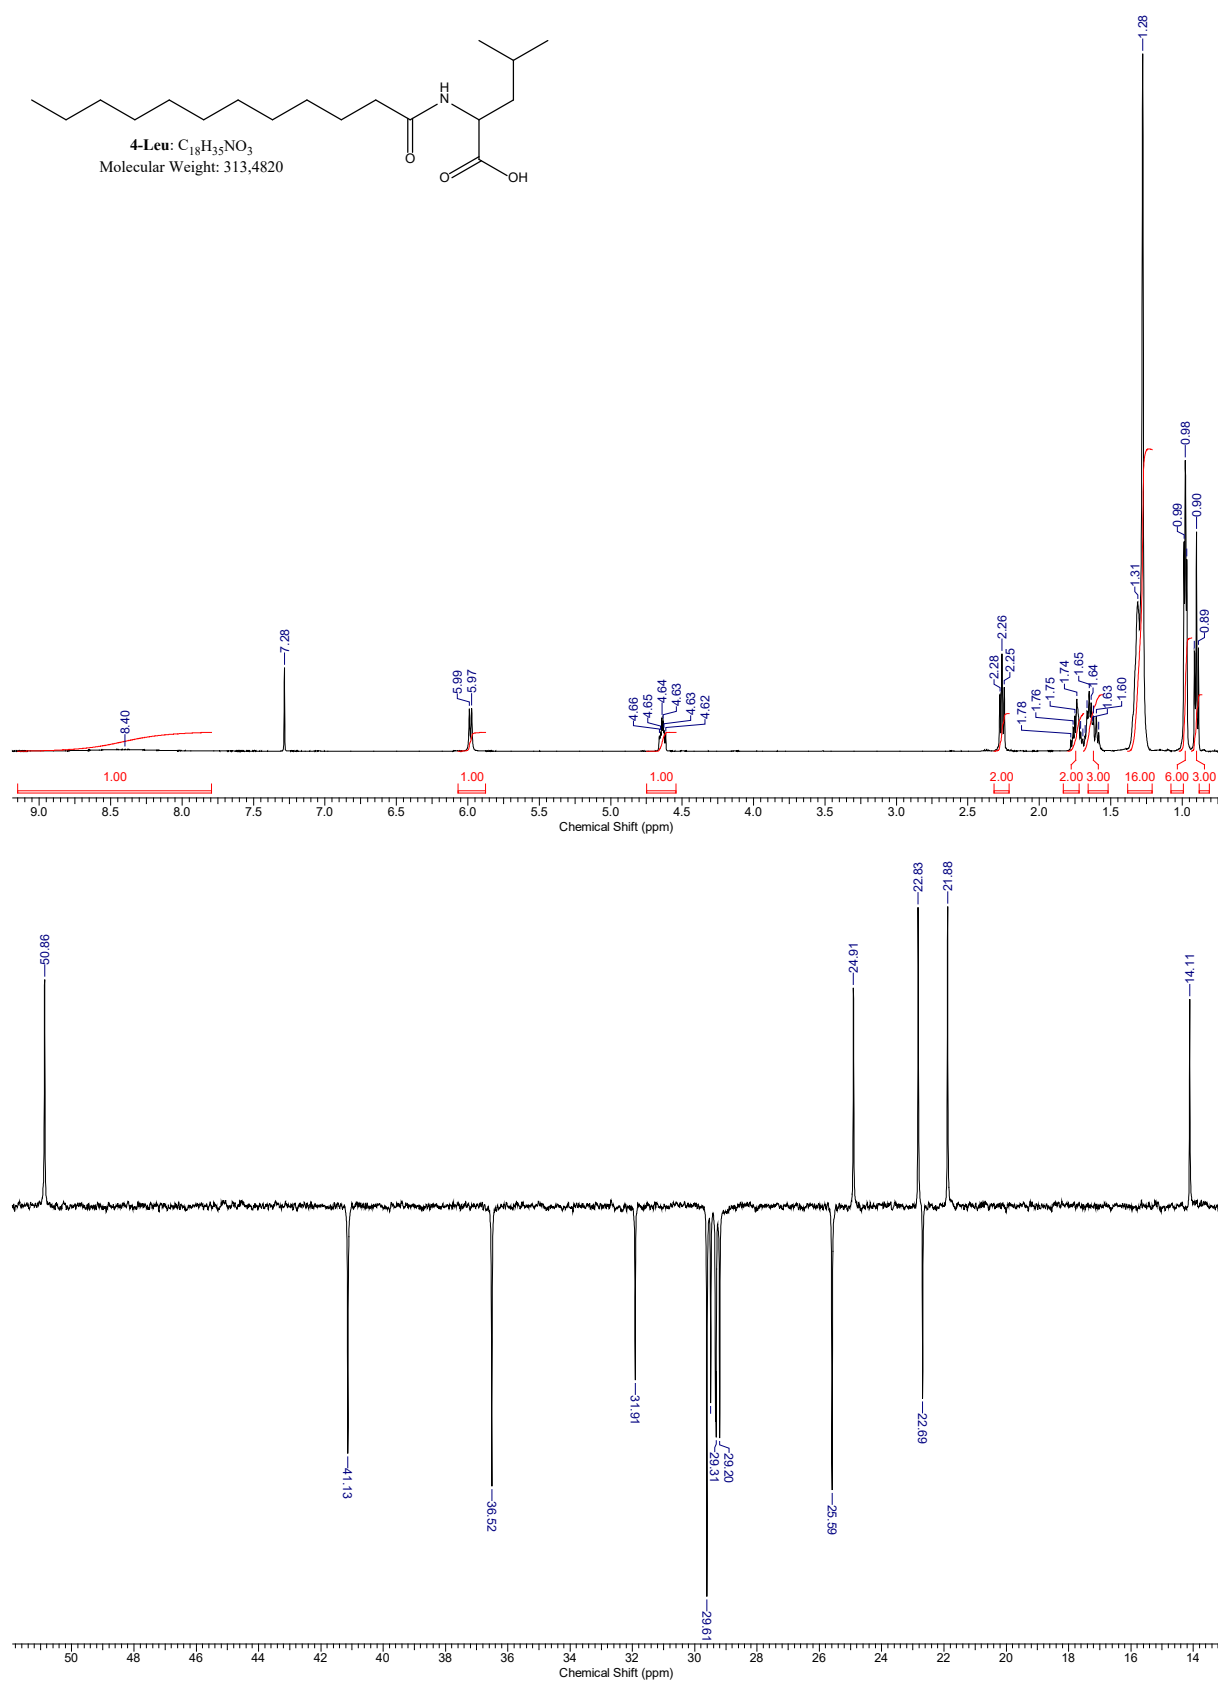

Figure S4. <sup>1</sup>H NMR (500 MHz) and <sup>13</sup>C NMR (125 MHz) spectra in CDCl<sub>3</sub> for 4-Leu.

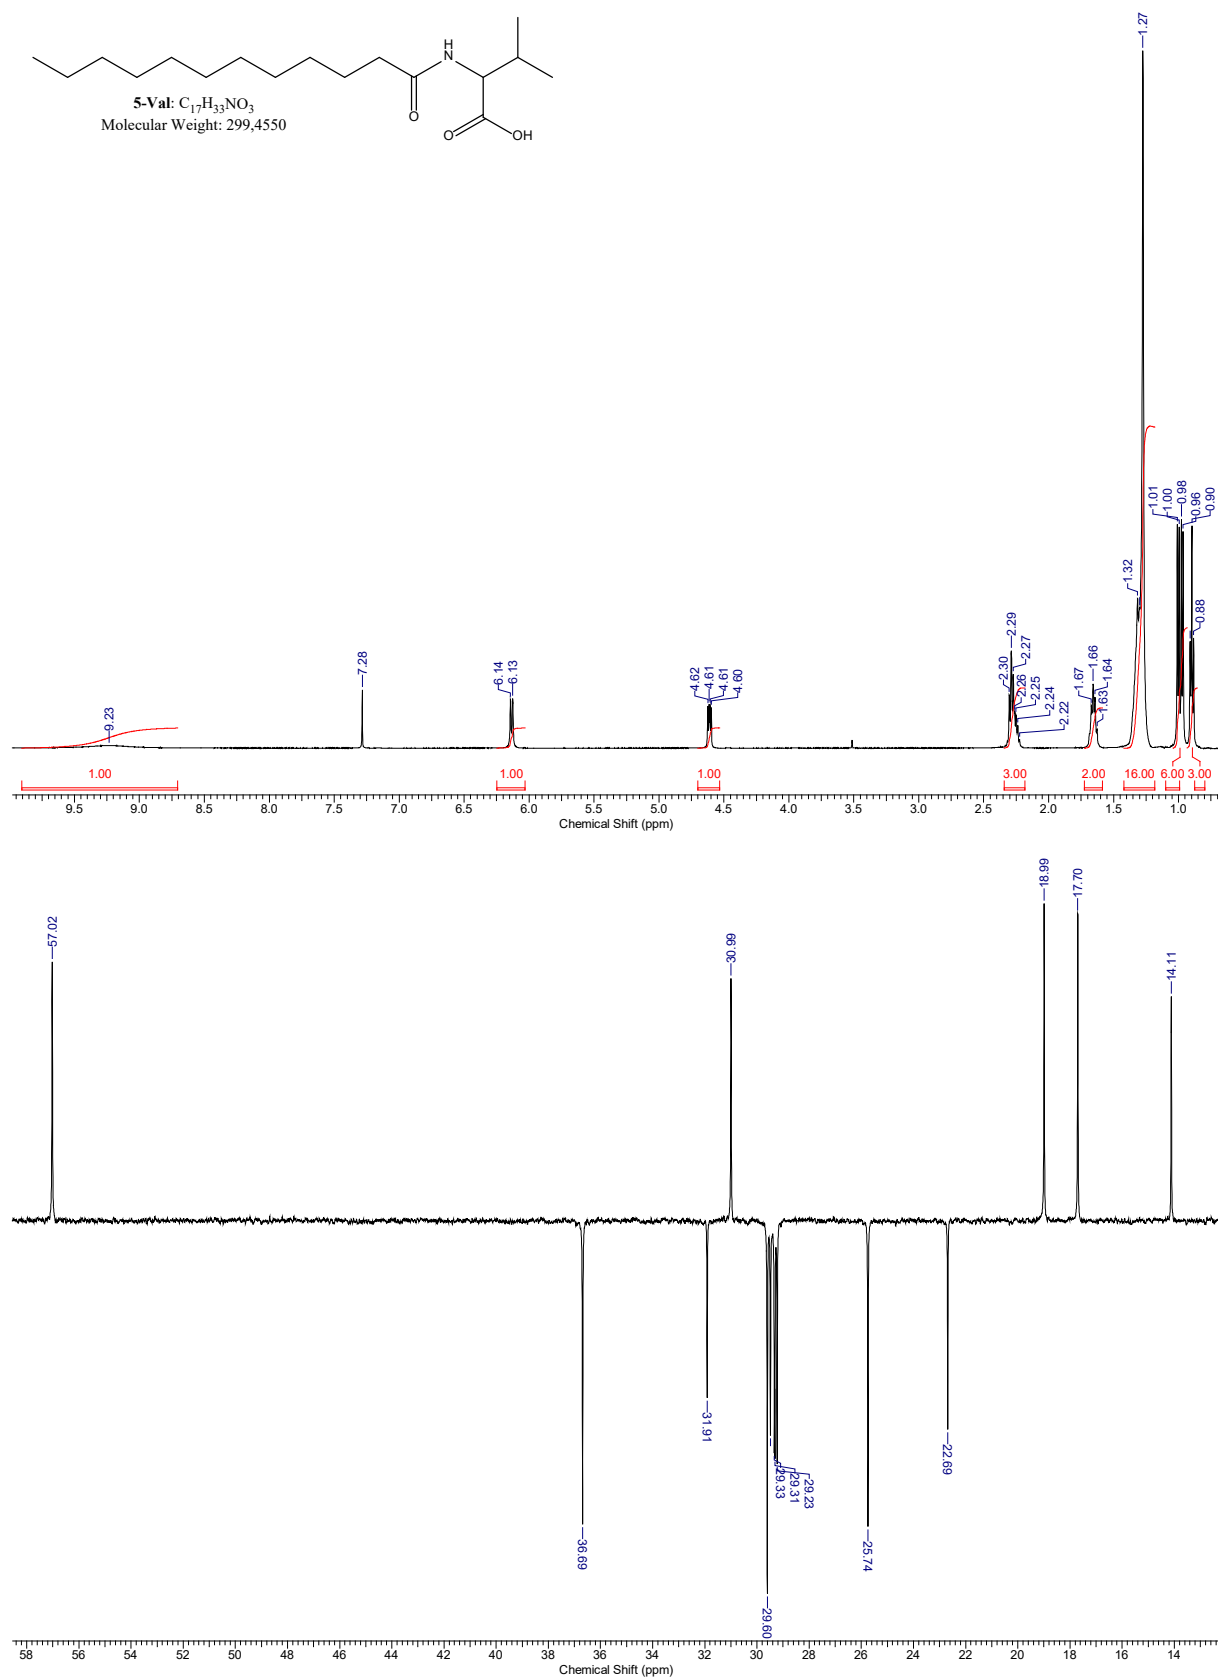

Figure S5. <sup>1</sup>H NMR (500 MHz) and <sup>13</sup>C NMR (125 MHz) spectra in CDCl<sub>3</sub> for 5-Val.
